# Supplementary material for: Investigation of structure-directing interactions within copper(i)thiocyanate complexes through X-ray analyses and non-covalent interaction (NCI) theoretical approach
Source: Royal Society of Chemistry journal article supplement (doi:10.1039/c6ce01339b), 2016-01-01
Supplement: c6ce01339b1.pdf [file c6ce01339b1.pdf]

## Investigation of structure-directing interactions within copper(I) thiocyanate complexes through X-ray analyses and Non-Covalent Interaction (NCI) theoretical approach

Khodayar Gholivand,<sup>a\*</sup> Kaveh Farshadfar,<sup>a</sup> S. Mark Roe,<sup>b</sup> Mahdieh Hosseini,<sup>a</sup> and Akram Gholami<sup>a</sup>

IR spectra of all compounds as well as NMR spectra of ligands are presented below. Complexes are only soluble in DMSO which decomposes them. <sup>13</sup>C NMR spectrum of **L**<sub>1</sub> has not been also reported as the signals was not distinguishable due to the low solubility.

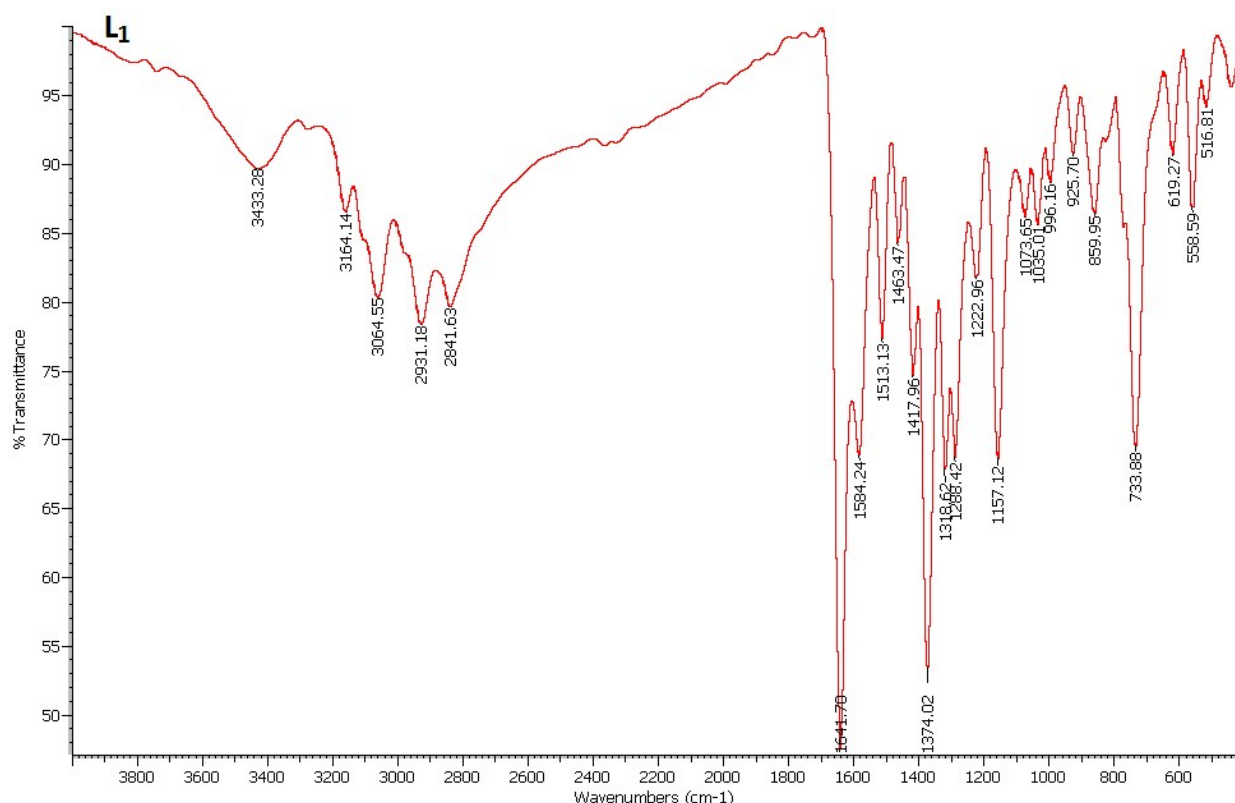

IR spectrum of **L**<sub>1</sub>

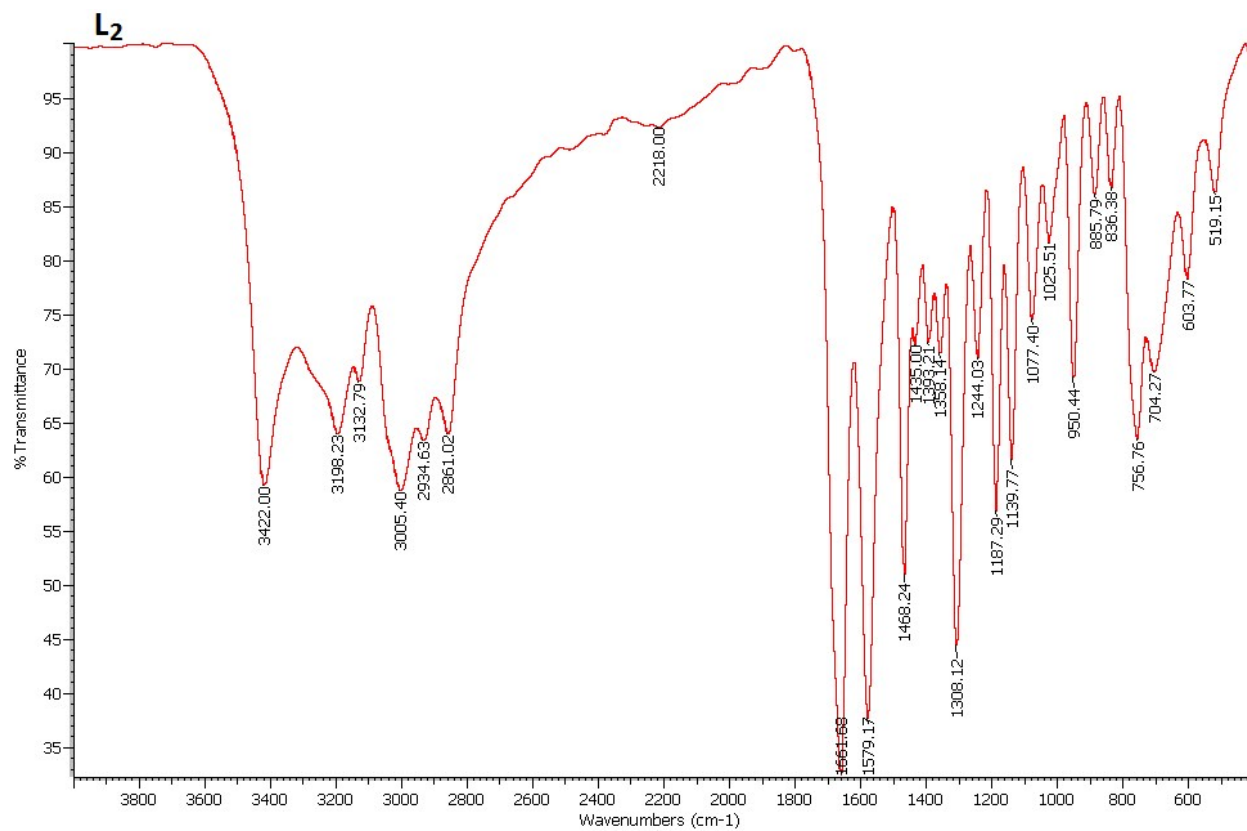

IR spectrum of L<sub>2</sub>

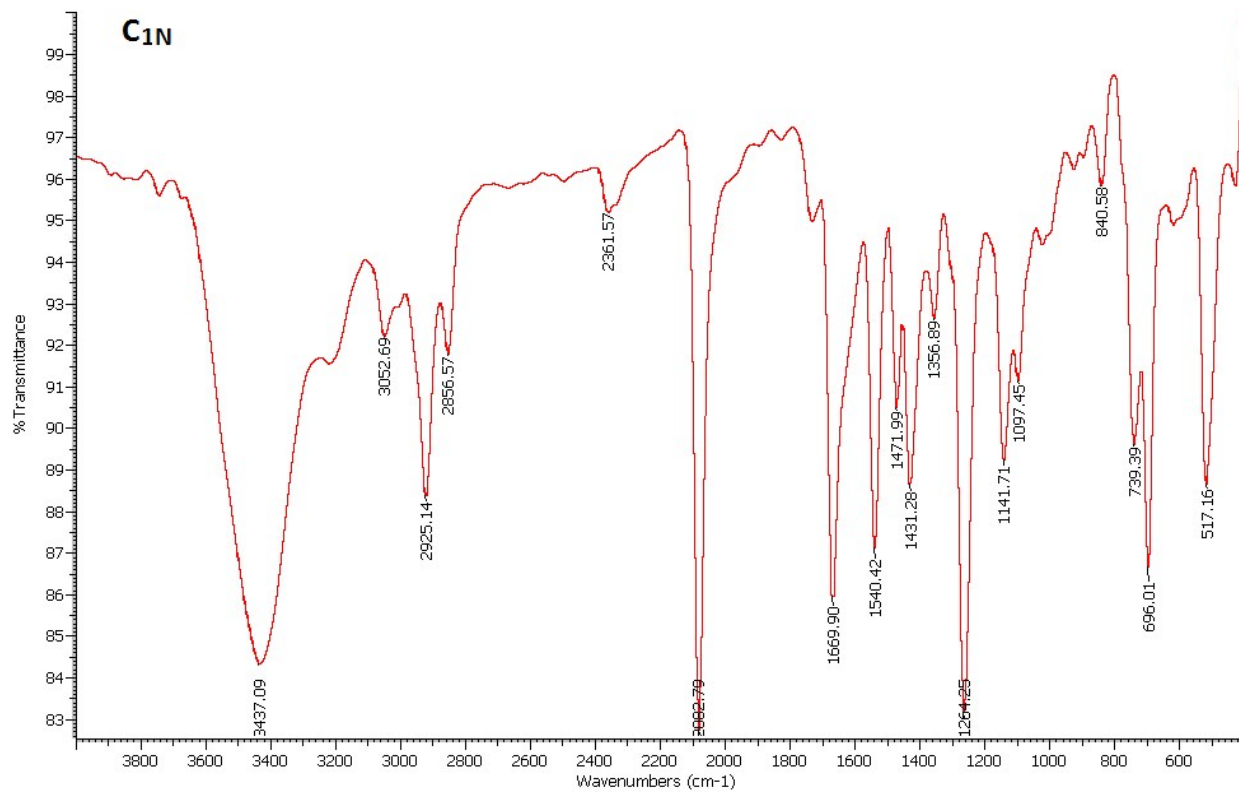

IR spectrum of **C<sub>1</sub>N**

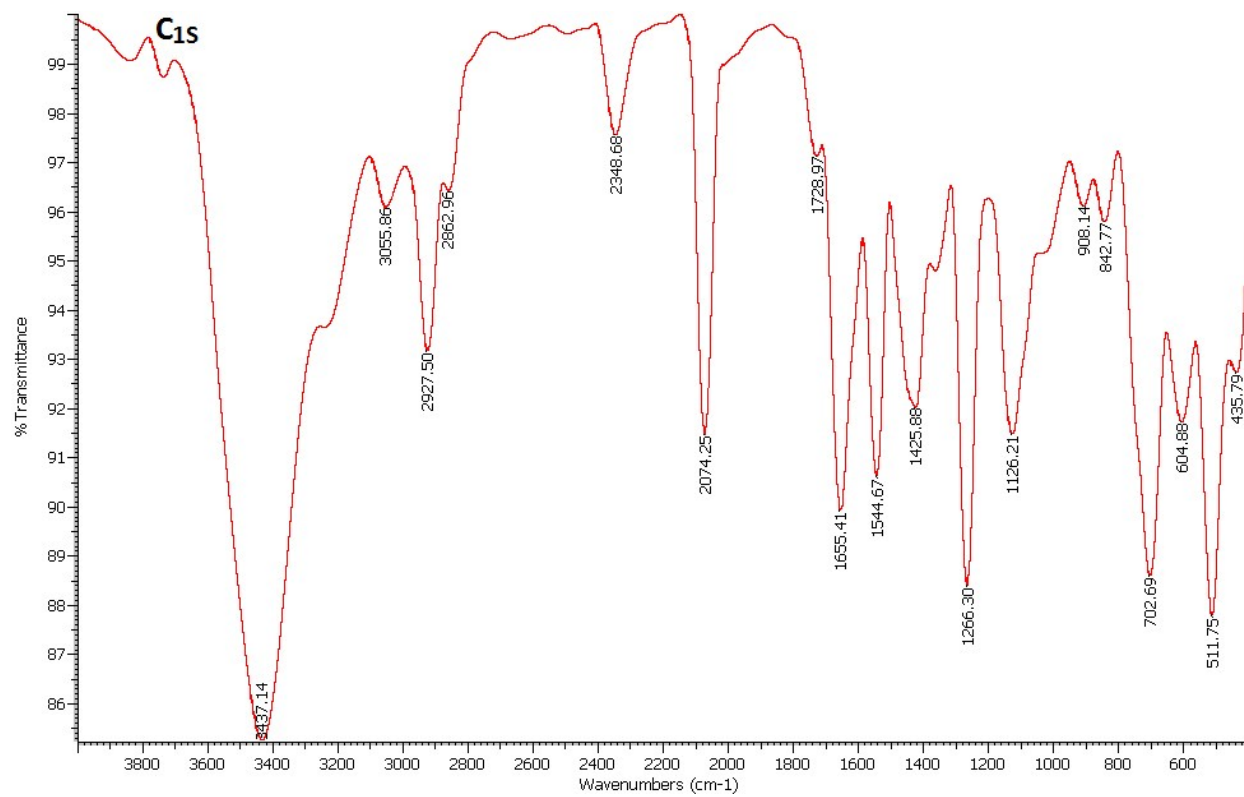

IR spectrum of C<sub>1</sub>s

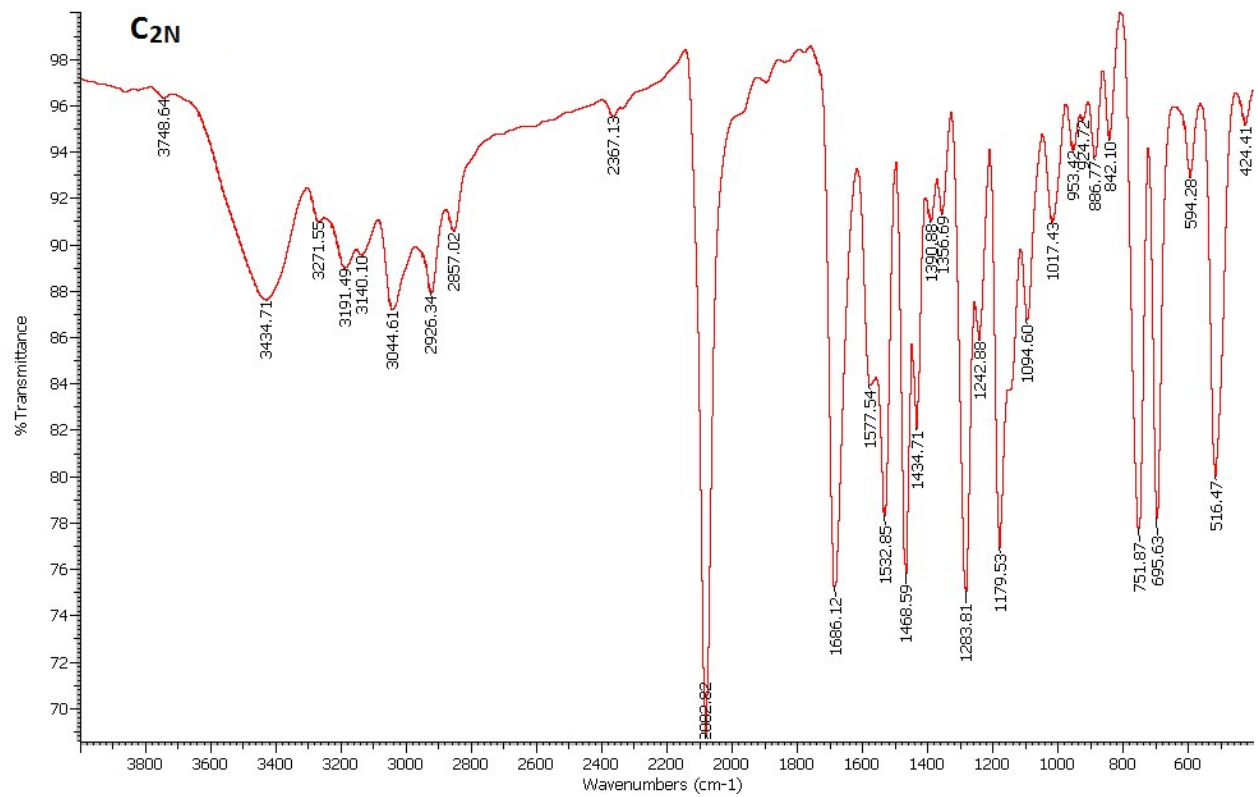

IR spectrum of C<sub>2</sub>N

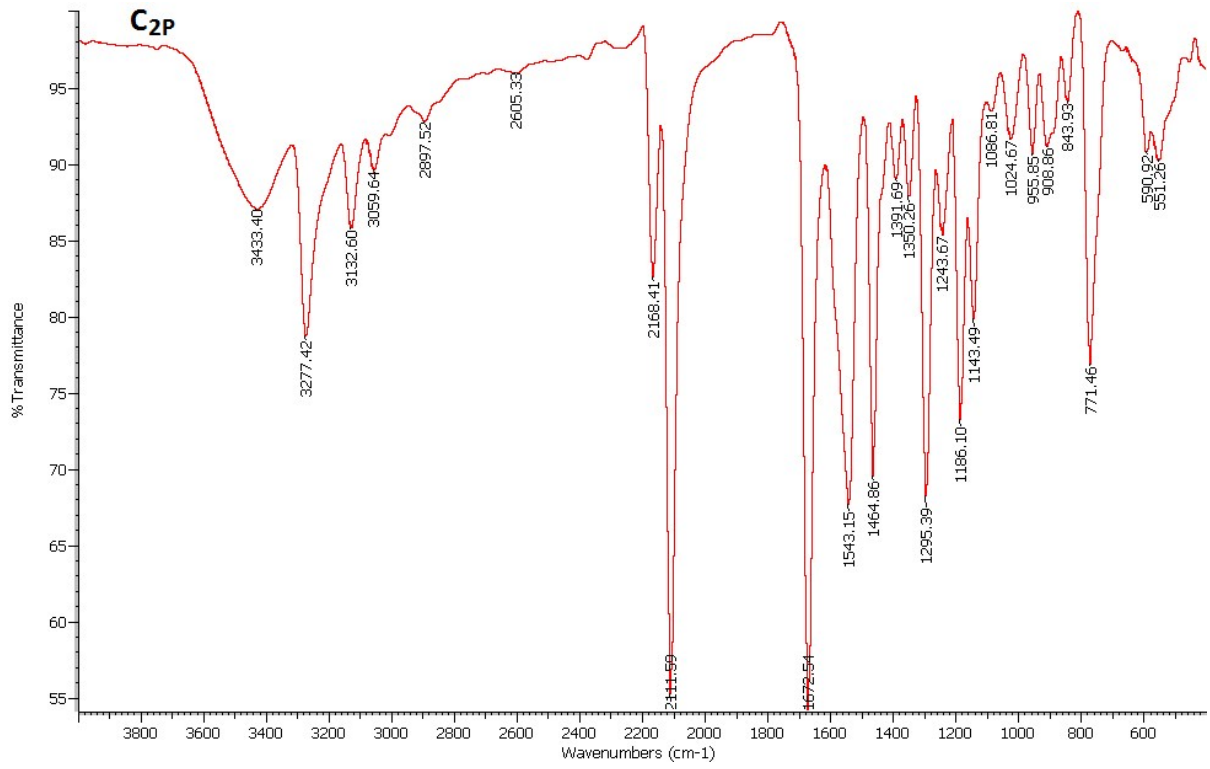

IR spectrum of **C<sub>2</sub>P**

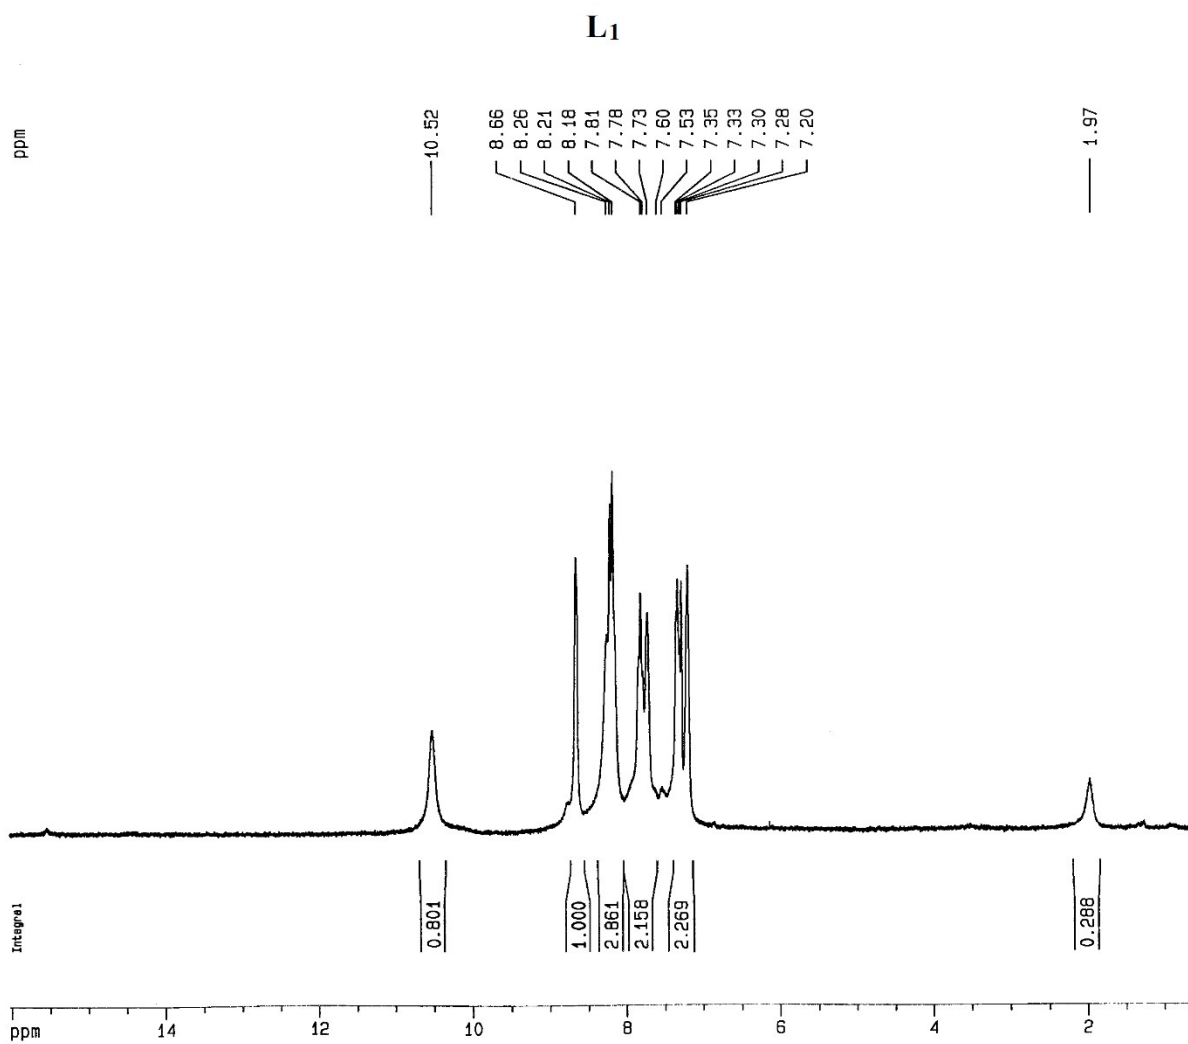

<sup>1</sup>H NMR spectrum of **L<sub>1</sub>** in CDCl<sub>3</sub>

# L<sub>2</sub>

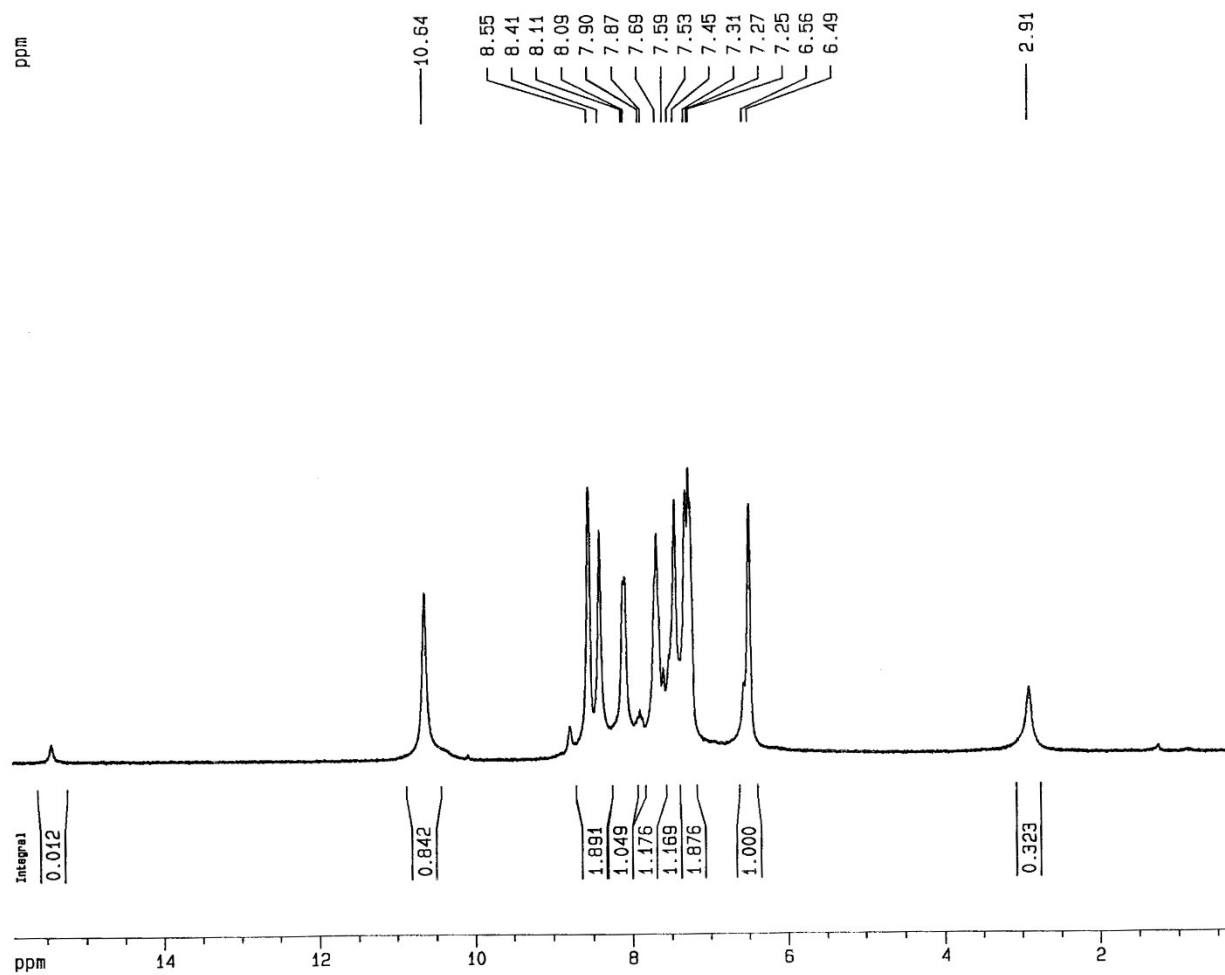

<sup>1</sup>H NMR spectrum of L<sub>2</sub> in CDCl<sub>3</sub>



# L<sub>2</sub>

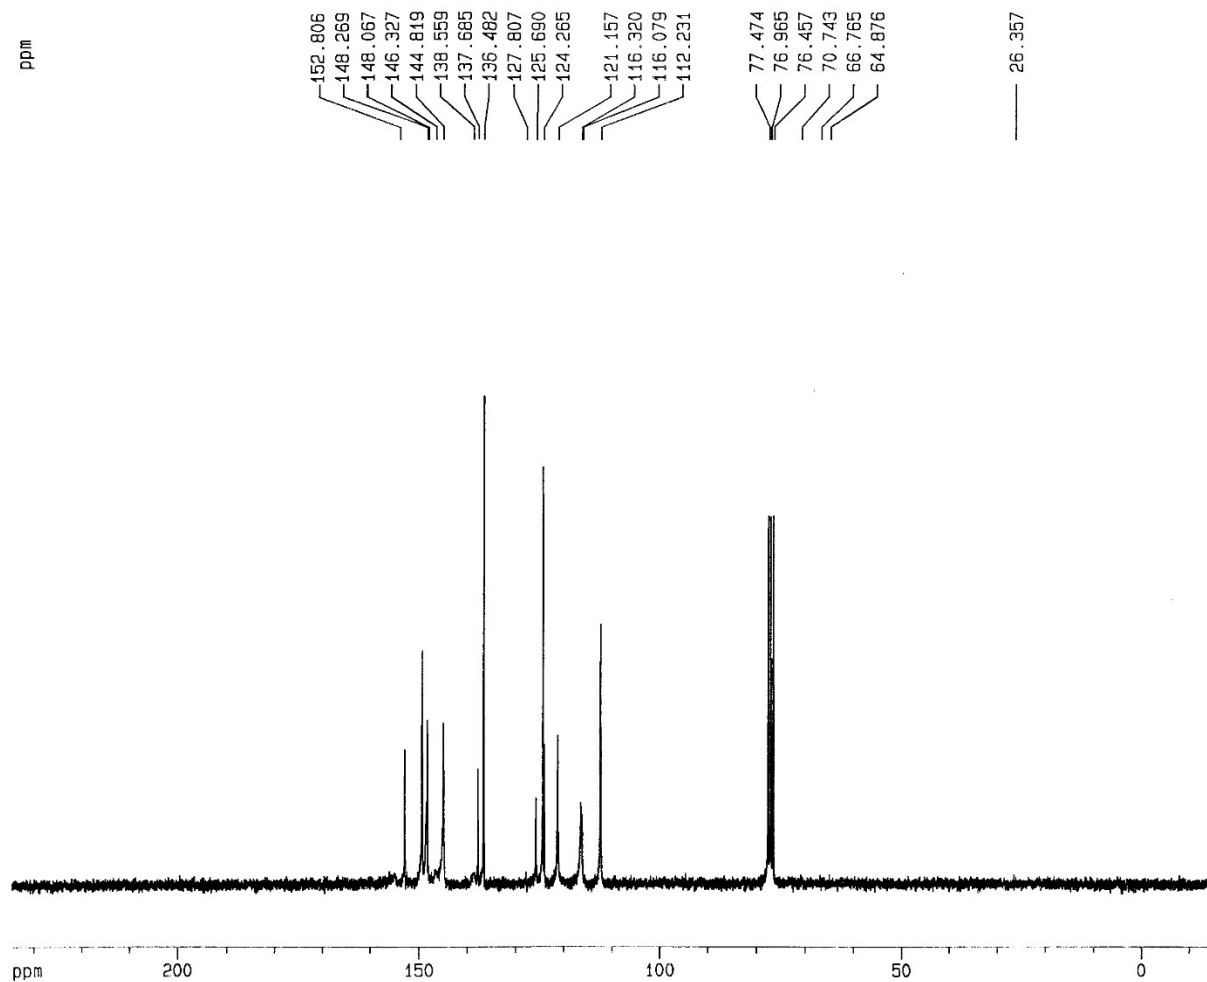

<sup>13</sup>C NMR spectrum of L<sub>2</sub> in CDCl<sub>3</sub>
